# Supplementary material for: Lost and Found: Piwi and Argonaute Pathways in Flatworms
Source: Front Cell Infect Microbiol. 2021 May 27;11:653695. doi: 10.3389/fcimb.2021.653695 (PMC8191739; doi:10.3389/fcimb.2021.653695)
Supplement: Supplementary file 9 [file Table_1.xlsx]

## Sheet: S1_miRNA_pathway_genes
Table S1. microRNA pathway genes detected in Flatworms.
		S.leucops	M.lignano	M.lignano (PRJNA371498-DV1)	P.vitattus	G.applanata	R.rostratum	M.fusca	K.amphipodicola	S.mediterranea	S.mediterranea PRJNA379262	B.semperi	E.nipponicum	G.salaris	S.mansoni	F.hepatica	F.gigantica	F.buski	P.westermani	P.kellicotti	E.multilocularis
Gene	Function
DRSH-1	Nuclear RNaseIII	Sle27997	Mli0003592	BOX15_Mlig007298,BOX15_Mlig015150g7,BOX15_Mlig001174	Pvi80755,Pvi80761	Gap6100	Rro278	Mfu58625	Kam3822	Sme000125.07	SMESG000014289		Eni.113802	Gsa6950543	Smp142510	FHE_08162	FGI_09964	FBU_08070	DEA37_0014459	KAF6776085.1+KAF6776087.1	EmuJ_001182900
PASH-1	dsRNA binding	Sle51700	gr_Mlig_v2_1509_15142_1	BOX15_Mlig027026,BOX15_Mlig020413,BOX15_Mlig017690	Pvi57496	Gap13059	Rro24832	Mfu62723	Kam17927		SMESG000030239			Gsa6951929	Smp087220	FHE_01231	FGI_00931	FBU_04872	DEA37_0006676	KAF6773238.1,KAF6773239.1	EmuJ_000576300
AGO-like	miRISC Argonaute	Sle40563	Mli0006881,Mli0005390,Mli0003216,Mli002732	BOX15_Mlig003634,BOX15_Mlig003798,BOX15_Mlig010628,BOX15_Mlig020781,BOX15_Mlig021460,BOX15_Mlig028871	Pvi28319	Gap26895	Rro52813,Rro52833	Mfu46046,Mfu48140	Kam15076	Sme036615.00,Sme016151.01,Sme008596.00	SMESG000047591	Bse53849	Eni.302019	Gsa6946991,Gsa6946992	Smp198380	FHE_03014	FGI_00759	FBU_06387	DEA37_0012164	KAF6775968.1	EmuJ_000346200
DCR-1	RNaseIII	Sle29941,Sle41313	Mli0017378,Mli0046553	BOX15_Mlig011615g2	Pvi76560	Gap1517	Rro16026	Mfu41897	Kam1817	Sme1736.0	SMESG000069643	Bse15225,Bse5026	Eni.141198	Gsa6948151	Smp169750	FHE_07357	ü	ü	DEA37_0012180+DEA37_0012181	KAF6777940.1	EmuJ_000085200
XPO-1	Nuclear export	Sle36599,Sle36600,Sle43321,Sle43324	Mli0002331	BOX15_Mlig011488	Pvi8282	Gap24252	Rro52385,Rro9831	Mfu49930,Mfu63274	Kam34671	Sme005143.02,Sme000191.02	SMESG000045533,SMESG000025559	Bse43497	Eni.281758,Eni.346312	Gsa6948230	Smp124820	FHE_07168	FGI_12357	FBU_07914	DEA37_0005824	KAF6776826.1	EmuJ_000331050
EXP-5	Nuclear export	Sle29731			Pvi29837	Gap28742	Rro1301	Mfu68671	Kam5408		SMESG000001611	Bse43498	Eni.103401	Gsa6948156	Smp152800	FHE_06873	ü	ü	DEA37_0012503	KAF6774548.1,KAF6774549.1	EmuJ_000210200
LOQS	dsRNA binding	Sle17302		BOX15_Mlig017322	Pvi30252	Gap4504	Rro34258,Rro34259	Mfu734,Mfu7703	Kam11049	Sme000968.03	SMESG000008825	bg_Bsem_v1_237348_0_1	Eni.237751	Gsa6951363	Smp023670	FHE_09113	FGI_10392	FBU_06044	DEA37_0010030	KAF6775989.1	EmuJ_000914800
TSN-1	Tudor Nuclease	Sle7957	Mli0007391,Mli0015940	BOX15_Mlig004199,BOX15_Mlig010255,BOX15_Mlig002532	Pvi28035,Pvi87871	Gap34830	Rro36454,Rro50127	Mfu42679	Kam9419	Sme001005.01,Sme001005.00	SMESG000062403	Bse47792	Eni.24985,Eni.386920	Gsa6948150	Smp_246850	FHE_09956	FGI_08996	FBU_07991	DEA37_0006792+DEA37_0003681	KAF6773484.1,KAF6773485.1	EmuJ_001073700,EmuJ_001073800,EmuJ_001073900,EmuJ_001074100,EmuJ_001074300
VIG-1	dsRNA binding	Sle2093	Mli0011667,Mli0009476	BOX15_Mlig000508	Pvi7463	Gap3001,Gap30213		Mfu10421	Kam34219	Sme001591.08	SMESG000008791	Bse14985,Bse25715	Eni.42376	Gsa6950600	Smp009310,Smp046780	D915_15229	FGI_04632	FBU_08283	DEA37_0009326		EmuJ_000091800
GW182	mRNA decay	Sle46330	Mli0005930	BOX15_Mlig002498,BOX15_Mlig016062,BOX15_Mlig015338	Pvi42152	Gap12960	ü	Mfu87248	Kam11039	ü	SMESG000072159	ü	Eni.181720	Gsa6948440	Smp168040	FHE_10754	FGI_08149	ü	DEA37_0014607		EmuJ_000920000
GLD-1	RNA binding	Sle25647,Sle33374	Mli0012214	BOX15_Mlig000586,BOX15_Mlig002858			ü				SMESG000069949,SMESG000068399			Gsa6947955	Smp149420	FHEP_04120		FBUS_05997	DEA37_0015081	KAF6776523.1
ASD-2	Parolog of GLD-1	Sle69669,Sle69675	Mli0000265,Mli0008187	BOX15_Mlig006002,BOX15_Mlig020226,BOX15_Mlig034417	Pvi77319	Gap2637	Rro37466,Rro37468	Mfu12114,Mfu73815	Kam24592	Sme022736.00,Sme017898.00,Sme006891.01,Sme000015.12	SMESG000080790	Bse32200	Eni.158247	Gsa6950904	Smp171860	FHE_02788	FGI_02724	FBU_04137	DEA37_0007604,DEA37_0008355	KAF6777964.1	EmuJ_000055900
FMR-1	RNA binding	Sle39660,Sle46790	Mli0003410	BOX15_Mlig016963,BOX15_Mlig018071,BOX15_Mlig009525	Pvi18999	Gap32528	Rro21389,Rro39038	Mfu45329	Kam1397,Kam736	Sme009851.02,Sme004270.03	SMESG000013448,SMESG000033194	Bse41973	Eni.44672		Smp099630	FHE_09617	FGI_03331	FBU_05297	DEA37_0001060	KAF6775234.1	EmuJ_000853200
CGH-1	Helicase	Sle23325	Mli0013321	BOX15_Mlig032789	Pvi101968,Pvi28049,Pvi52149,Pvi7852	Gap10076,Gap19018	Rro13838,Rro16523,Rro21515	Mfu24711	Kam1092,Kam5590	Sme002614.04,Sme000222.07	SMESG000027870,SMESG000073910	Bse20791,Bse33477,Bse33478	Eni.533	Gsa6948035,Gsa6951422	Smp211330	FHE_01153	FGI_11544	FBU_05506	DEA37_0003178	KAF6774586.1	EmuJ_000123700,EmuJ_001180000
NHL-2	NHL domain	Sle47865,Sle47871	Mli0005631,Mli0007278,Mli0010435	BOX15_Mlig030022,BOX15_Mlig029842,BOX15_Mlig015795,BOX15_Mlig029404,BOX15_Mlig002221	Pvi54339	Gap29627,Gap29634	Rro43755	Mfu61222,Mfu71963	Kam14365	Sme000251.11	SMESG000059098	Bse40485	Eni.59174,Eni.342983	Gsa6953386	Smp054730+054740+054750	FHE_08798	FGI_01111	FBU_01140	DEA37_0007677	KAF6777512.1	EmuJ_000333000
ü	Sequence contains expected functional domain
ü	Sequence without expected functional domain
