# Supplementary material for: Lost and Found: Piwi and Argonaute Pathways in Flatworms
Source: Front Cell Infect Microbiol. 2021 May 27;11:653695. doi: 10.3389/fcimb.2021.653695 (PMC8191739; doi:10.3389/fcimb.2021.653695)
Supplement: Supplementary file 10 [file Table_2.xlsx]

## Sheet: S2_endoRNA_pathway_genes
Table S2. Endogenous RNA interferent pathway genes detected in Flatworms.
		S.leucops	M.lignano	M.lignano (PRJNA371498-DV1)	P.vitattus	G.applanata	R.rostratum	M.fusca	K.amphipodicola	S.mediterranea	S.mediterranea PRJNA379262	B.semperi	E.nipponicum	G.salaris	S.mansoni	F.hepatica	F.gigantica	F.buski	P.westermani	P.kellicotti	E.multilocularis
Gene	Function
DCR-1	RNaseIII	Sle29941,Sle41313	Mli0017378,Mli0046553	BOX15_Mlig011615	Pvi76560	Gap1517	Rro16026	Mfu41897	Kam1817	Sme1736.0	SMESG000069643	Bse15225,Bse5026	Eni.141198	Gsa6948151	Smp169750	FHE_07357	ü	ü	DEA37_0012180+DEA37_0012181	KAF6777940.1	EmuJ_000085200
FL-AGO	siRISC Argonaute	Sle67413	Mli0016590	BOX15_Mlig013602,BOX15_Mlig029800,BOX15_Mlig027596	Pvi73968	Gap9354	Rro36342	Mfu83113	bg_Kamp_v1_66491_0_4	Sme000678.07,Sme000678.05	SMESG000050994,SMESG000051000	Bse12292	Eni.140945,Eni.167258,Eni.187177	Gsa6950580	Smp179320,Smp102690	FHE_04931,FHE_08251	FGI_11320,FGI_07515	FBU_08304,FBU_11493	DEA37_0006396,DEA37_0012733	KAF6773610.1,KAF6768787.1	EmuJ_000739100,EmuJ_000911700
ERI-1	Exonuclease	Sle40149	ü	BOX15_Mlig010094,BOX15_Mlig011273	Pvi19083	Gap10382,Gap30179	Rro17910,Rro7851	Mfu41169,Mfu82589	Kam35460	Sme012915.0,Sme002515.02	SMESG000016564	Bse12465,Bse15399	Eni.273604	Gsa6951919	Smp029850	FHE_10888	FGI_02969	FBU_07752	DEA37_0013328	KAF6779340.1
R02D3.8	Paralog of ERI-1	Sle23045	Mli0007829,Mli0009029		Pvi17505	Gap20595,Gap20596	Rro15875	Mfu41314,Mfu41318,Mfu72512				Bse40073	Eni.99068	ü	Smp157760,Smp051420	FHE_05736,FHE_04331	FGI_06175,FGI_03542	FBU_08406,FBU_02608	DEA37_0013395,DEA37_0013969	KAF6772673.1,KAF6773816.1	EmuJ_000057100,EmuJ_001046300
ERI-7	Helicase	Sle20940	Mli21619,Mli0001313,Mli0002238	BOX15_Mlig023581,BOX15_Mlig022361,BOX15_Mlig002167	Pvi9614	Gap11427	Rro10632	Mfu41252	Kam3944	Sme006782.00	SMESG000013780	Bse6872
RdRP	RNA polymerase		Mli0004552,Mli0013431	BOX15_Mlig023635,BOX15_Mlig005031,BOX15_Mlig000965		Gap32757,Gap46700		Mfu30032
DRH-1	Helicase	Sle39280,Sle49993,Sle62655	Mli0000451,Mli0000451,Mli0001089,Mli0002070	BOX15_Mlig026302,BOX15_Mlig031784,BOX15_Mlig006822,BOX15_Mlig004869,BOX15_Mlig021912,BOX15_Mlig016200,BOX15_Mlig018307,BOX15_Mlig021912,BOX15_Mlig004869,BOX15_Mlig004869	Pvi85691	Gap30756,Gap31989,Gap31992	Rro56319,Rro56320	Mfu70625,Mfu70629,Mfu79370	Kam27970	Sme018523.01,Sme018162.02,Sme018162.01,Sme008210.03,Sme008210.02,Sme005706.01,Sme002806.02,Sme002806.01,Sme000370.07	SMESG000024315,SMESG000014831,SMESG000014858,SMESG000014877,SMESG000014843,SMESG000025858	Bse19327,Bse19330,Bse4880		Gsa6952807	Smp083710	FHE_08875	FGI_02292	FBU_10696	DEA37_0013708	KAF6776567.1+KAF6768503.1	EmuJ_000741400
ü	Sequence contains expected functional domain
ü	Sequence without expected functional domain
