# Supplementary material for: Lost and Found: Piwi and Argonaute Pathways in Flatworms
Source: Front Cell Infect Microbiol. 2021 May 27;11:653695. doi: 10.3389/fcimb.2021.653695 (PMC8191739; doi:10.3389/fcimb.2021.653695)
Supplement: Supplementary file 11 [file Table_3.xlsx]

## Sheet: S3_exoRNA_pathway_genes
Table S3. Exogenous RNA interferent pathway genes detected in Turbellarians.
		S.leucops	M.lignano	M.lignano (PRJNA371498-DV1)	P.vitattus	G.applanata	R.rostratum	M.fusca	K.amphipodicola	S.mediterranea	S.mediterranea PRJNA379262	B.semperi	E.nipponicum	G.salaris	S.mansoni	F.hepatica	F.gigantica	F.buski	P.westermani	P.kellicotti	E.multilocularis
Gene	Function
SID-like	dsRNA uptake	Sle40404,Sle43839	Mli0002007,Mli0003934,Mli0016250	BOX15_Mlig015653,BOX15_Mlig024104,BOX15_Mlig001878,BOX15_Mlig033109,BOX15_Mlig025017,BOX15_Mlig023659,BOX15_Mlig005675,BOX15_Mlig027904,BOX15_Mlig005546,BOX15_Mlig014992,BOX15_Mlig005979	Pvi68128,Pvi68159	Gap13181,Gap14106,Gap23828	Rro16097,Rro24491,Rro3890,Rro44471	Mfu49697,Mfu70025	Kam5532,Kam5533,Kam5681	Sme004977.02,Sme002106.02,Sme001510.05	SMESG000075887,SMESG000041575,SMESG000041572	Bse39632	Eni.125079	Gsa6948856,Gsa6948857	Smp_344430	FHE_01470	FGI_05634	FBU_00095	DEA37_0009901	KAF6777569.1	EmuJ_000973200
DCR-2	RNaseIII			BOX15_Mlig002075	Pvi60657,Pvi87190	Gap26923,Gap38012,Gap38586		Mfu84166		Sme04816.0	SMESG000073604	bg_Bsem_v1_126260_1_1	Eni.274780	Gsa9477076,Gsa9477078	Smp033600	FHE_05200,FHE_05201	FGI_07065,FGI_07067	FBU_08366,FBU_10831	DEA37_0008007	KAF6775028.1,KAF6775029.1	EmuJ_000181800,EmuJ_000180900
DRH-1	Helicase	Sle39280,Sle49993,Sle62655	Mli0000451,Mli0000451,Mli0001089,Mli0002070	BOX15_Mlig026302,BOX15_Mlig031784,BOX15_Mlig006822,BOX15_Mlig004869,BOX15_Mlig021912,BOX15_Mlig016200,BOX15_Mlig018307,BOX15_Mlig021912,BOX15_Mlig004869,BOX15_Mlig004869	Pvi85691	Gap30756,Gap31989,Gap31992	Rro56319,Rro56320	Mfu70625,Mfu70629,Mfu79370	Kam27970	Sme018523.01,Sme018162.02,Sme018162.01,Sme008210.03,Sme008210.02,Sme005706.01,Sme002806.02,Sme002806.01,Sme000370.07	SMESG000024315,SMESG000014831,SMESG000014858,SMESG000014877,SMESG000014843,SMESG000025858	Bse19327,Bse19330,Bse4880		Gsa6952807	Smp083710	FHE_08875	FGI_02292	FBU_10696	DEA37_0013708	KAF6776567.1+KAF6768503.1	EmuJ_000741400
MUT-7	ExoRNase		Mli0009929	BOX15_Mlig013075,BOX15_Mlig031560	Pvi20797	Gap11951	bg_Rros_v1_56084_0_1	Mfu50451	Kam1029			Bse12609
FL-AGO	siRISC Argonaute	Sle67413	Mli0016590	BOX15_Mlig013602,BOX15_Mlig029800,BOX15_Mlig027596	Pvi73968	Gap9354	Rro36342	Mfu83113	bg_Kamp_v1_66491_0_4	Sme000678.07,Sme000678.05	SMESG000050994,SMESG000051000	Bse12292	Eni.140945,Eni.167258,Eni.187177	Gsa6950580	Smp179320,Smp102690	FHE_04931,FHE_08251	FGI_11320,FGI_07515	FBU_08304,FBU_11493	DEA37_0006396,DEA37_0012733	KAF6773610.1,KAF6768787.1	EmuJ_000739100,EmuJ_000911700
TSN-1	Tudor Nuclease	Sle7957	Mli0007391,Mli0015940	BOX15_Mlig004199,BOX15_Mlig010255,BOX15_Mlig002532	Pvi28035,Pvi87871	Gap34830	Rro36454,Rro50127	Mfu42679	Kam9419	Sme001005.01,Sme001005.00	SMESG000062403	Bse47792	Eni.24985,Eni.386920	Gsa6948150	Smp_246850	FHE_09956	FGI_08996	FBU_07991	DEA37_0006792+DEA37_0003681	KAF6773484.1,KAF6773485.1	EmuJ_001073700,EmuJ_001073800,EmuJ_001073900,EmuJ_001074100,EmuJ_001074300
VIG-1	dsRNA binding	Sle2093	Mli0011667,Mli0009476	BOX15_Mlig000508	Pvi7463	Gap3001,Gap30213		Mfu10421	Kam34219	Sme001591.08	SMESG000008791	Bse14985,Bse25715	Eni.42376	Gsa6950600	Smp009310,Smp046780	D915_15229	FGI_04632	FBU_08283	DEA37_0009326		EmuJ_000091800
XRN-1	5'-3' exonuclease	Sle5047,Sle65925	Mli0002433,Mli0010854,Mli0017890	BOX15_Mlig004878,BOX15_Mlig023895	Pvi16444	Gap25882,Gap25883	Rro43490,Rro43495	Mfu61830,Mfu74221	Kam18408	Sme000444.11,Sme000444.09	SMESG000080199	Bse24029		Gsa6953365	Smp140420	FHE_05382	FGI_01051	FBU_09392	DEA37_0004662+DEA37_0004661	KAF6779371.1	EmuJ_000228400
ü	Sequence contains expected functional domain
ü	Sequence without expected functional domain
