# Supplementary material for: Lost and Found: Piwi and Argonaute Pathways in Flatworms
Source: Front Cell Infect Microbiol. 2021 May 27;11:653695. doi: 10.3389/fcimb.2021.653695 (PMC8191739; doi:10.3389/fcimb.2021.653695)
Supplement: Supplementary file 12 [file Table_4.xlsx]

## Sheet: S4_amplification_pathway_genes
Table S4. Amplification pathway genes detected in Flatworms.
		S.leucops	M.lignano	M.lignano (PRJNA371498-DV1)	P.vitattus	G.applanata	R.rostratum	M.fusca	K.amphipodicola	S.mediterranea	S.mediterranea PRJNA379262	B.semperi	E.nipponicum	G.salaris	S.mansoni	F.hepatica	F.gigantica	F.buski	P.westermani	P.kellicotti	E.multilocularis
Gene	Function
RdRP	RNA polymerase		Mli0004552,Mli0013431	BOX15_Mlig023635,BOX15_Mlig005031,BOX15_Mlig000965		Gap32757,Gap46700		Mfu30032
GLD-2	Poly-A polymerase		Mli0003544	BOX15_Mlig025907,BOX15_Mlig022510,BOX15_Mlig010770	Pvi29280	Gap36431,Gap43762	Rro45800	Mfu16951,Mfu67547,Mfu9099	Kam10752	Sme000821.03	SMESG000026402	Bse16262			Smp005640	FHE_06591	FGI_05638	FBU_07688	PW_00000567:146066-167975:+	KAF6778661.1	EmuJ_000319900
PIR-1	Phosphatase	Sle33148	Mli0012403,Mli0022195	BOX15_Mlig018194,BOX15_Mlig010689,BOX15_Mlig005465	Pvi42914	Gap35312	Rro22455	Mfu79275	Kam15110	Sme002749.01	SMESG000001476,SMESG000010123	Bse30403	Eni.347249	Gsa6952886	Smp_331710	FHE_07022	FGI_08135		DEA37_0011376		EmuJ_000245000
SMG-2	Maintains 2dary RNA	Sle27448,Sle51169	Mli0005177,Mli0045908	BOX15_Mlig025056	Pvi28565,Pvi44256	Gap26750,Gap29934	Rro27365,Rro34915,Rro38261	Mfu24178,Mfu53197,Mfu75587	Kam1493,Kam20693,Kam22270,	Sme000027.03	SMESG000077362	Bse41226,Bse41231	Eni.82403	Gsa6948682	Smp061590	FHE_05843,FHE_06474,FHE_08557	FGI_04808,FGI_09652,FGI_11079	FBU_07532	DEA37_0012874	KAF6768494.1	EmuJ_001040700
SMG-6	Maintains 2dary RNA	Sle36692	Mli0010994	BOX15_Mlig012095		Gap27879,Gap4387	Rro12416	Mfu29956,Mfu45767	Kam17340,Kam17705	Sme012570.04,Sme006651.00	SMESG000051442	ü		Gsa6951325	Smp131650	FHE_07174	FGI_08273	FBU_03131	DEA37_0000423	LOND01001551.1:35884..68685:-	EmuJ_000831300
RSD-3	Spreading of RNAi	Sle13995,Sle31954	Mli0002119,Mli0045364	BOX15_Mlig034596,BOX15_Mlig015934,BOX15_Mlig011426,BOX15_Mlig027591	Pvi20516,Pvi67401	Gap23114,Gap36895,Gap38110,Gap602	Rro33130,Rro33509	Mfu77616,Mfu77639	Kam5444,Kam5445	Sme000282.02	SMESG000019746	Bse25901,Bse25907	Eni.62402,Eni.202242	Gsa6949331	Smp140330	FHE_03361	FGI_04387	FBU_09936	DEA37_0010245	KAF6769181.1	EmuJ_000113400
TSN-1	Tudor Nuclease	Sle7957	Mli0007391,Mli0015940	BOX15_Mlig004199,BOX15_Mlig010255,BOX15_Mlig002532	Pvi28035,Pvi87871	Gap34830	Rro36454,Rro50127	Mfu42679	Kam9419	Sme001005.01,Sme001005.00	SMESG000062403	Bse47792	Eni.24985,Eni.386920	Gsa6948150	Smp_246850	FHE_09956	FGI_08996	FBU_07991	DEA37_0006792+DEA37_0003681	KAF6773484.1,KAF6773485.1	EmuJ_001073700,EmuJ_001073800,EmuJ_001073900,EmuJ_001074100,EmuJ_001074300
VIG-1	dsRNA binding	Sle2093	Mli0011667,Mli0009476	BOX15_Mlig000508	Pvi7463	Gap3001,Gap30213		Mfu10421	Kam34219	Sme001591.08	SMESG000008791	Bse14985,Bse25715	Eni.42376	Gsa6950600	Smp009310,Smp046780	D915_15229	FGI_04632	FBU_08283	DEA37_0009326		EmuJ_000091800
ü	Sequence contains expected functional domain
ü	Sequence without expected functional domain
