# Supplementary material for: Lost and Found: Piwi and Argonaute Pathways in Flatworms
Source: Front Cell Infect Microbiol. 2021 May 27;11:653695. doi: 10.3389/fcimb.2021.653695 (PMC8191739; doi:10.3389/fcimb.2021.653695)
Supplement: Supplementary file 13 [file Table_5.xlsx]

## Sheet: S5_chromatin_remodeling_genes
Table S5. Chromatin remodeling genes associated to RNA interference detected in Flatworms.
		S.leucops	M.lignano	M.lignano (PRJNA371498-DV1)	P.vitattus	G.applanata	R.rostratum	M.fusca	K.amphipodicola	S.mediterranea	S.mediterranea PRJNA379262	B.semperi	E.nipponicum	G.salaris	S.mansoni	F.hepatica	F.gigantica	F.buski	P.westermani	P.kellicotti	E.multilocularis
Gene	Function
PRMT-5	Metil transferase	Sle75182,Sle75236	Mli0047166,Mli0048794	BOX15_Mlig014197	Pvi142522,Pvi163185	Gap10991	Rro51496	Mfu45133	Kam455	Sme002031.05	SMESG000023057	Bse3011,Bse6891	Eni.158807	Gsa6952511	Smp171150	FHE_07056	FGI_00772	FBU_08496	DEA37_0006548	KAF6779390.1	EmuJ_000795200
ZFP-1	Zinc Finger	Sle13100,Sle1457,Sle18027	Mli0000939	BOX15_Mlig032167,BOX15_Mlig024249,BOX15_Mlig001868	Pvi18267,Pvi18268	Gap13588,Gap18340,Gap25804	Rro28828,Rro490	Mfu43333,Mfu56387	Kam660	Sme000148.00	SMESG000057438	Bse7675			Smp_332690	FHE_08287	FGI_00144	FBU_08772	DEA37_0009080	KAF6779014.1
PHF-14/15	ZFP-1 paralog	Sle22430	Mli0001747	BOX15_Mlig026578,BOX15_Mlig018183	Pvi41031,Pvi41034	Gap16705,Gap16708	ü	Mfu75408	Kam9702	Sme000002.13	SMESG000049566	bg_Bsem_v1_127855_0_1	Eni.289401,Eni.133115	Gsa6950150	Smp_145470	FHE_05056/FHE_10375	FGI_08551/FGI_01619	FBU_00210/FBU_09791	DEA37_0010832	KAF6780517.1/KAF6768587.1	EmuJ_001178100
HPL-1	HP1 homolog	Sle43630,Sle63698,Sle7939	Mli0001501	BOX15_Mlig029595,BOX15_Mlig016481,BOX15_Mlig017863	Pvi37177,Pvi7459,Pvi7485	Gap10328,Gap22704,Gap22705,Gap34770	Rro17321,Rro17323,Rro40589	Mfu14531,Mfu20628,Mfu68275	Kam35701,Kam35722,Kam35751,Kam7644	Sme005953.00,Sme000028.12	SMESG000039690,SMESG000004606	Bse12732,Bse27649	Eni.102313,Eni.371117	Gsa6949356	Smp179650	FHE_03214	FGI_11261	FBU_02926	DEA37_0012515	KAF6775259.1	EmuJ_000492600,EmuJ_000830000
GFL-1	Chromatin remodeling	Sle10174,Sle30680	Mli0002310	BOX15_Mlig025434,BOX15_Mlig008259,BOX15_Mlig022474	Pvi7252	Gap11546,Gap16659,Gap18893	Rro100	Mfu5511	Kam2864	Sme004283.06,Sme003786.00	SMESG000030330	Bse16954	Eni.223359	Gsa6950375	Smp070760	FHE_09173	FGI_08500	FBU_04955	DEA37_0000074	KAF6779513.1	EmuJ_001012100
MES-2	Polycomb group	Sle67171	Mli20770,Mli0001350,Mli0011336	BOX15_Mlig015632,BOX15_Mlig029809	Pvi18231	Gap4615	Rro17464	Mfu44043	Kam669	Sme000174.06	SMESG000045744	Bse30191	Eni.112843	Gsa6953371	Smp078900	FHE_08432	FGI_01928	ü	DEA37_0008754	KAF6774960.1	EmuJ_000439200
MES-6	Polycomb group	Sle24122	Mli0000323	BOX15_Mlig028922	Pvi7315	Gap4728	Rro7466	Mfu9548	Kam6631	Sme003314.01,Sme003314.00	SMESG000045902	Bse20572	Eni.229380,Eni.229390	Gsa6947337	Smp165220	FHE_02653	FGI_11279	FBU_00075	DEA37_0001201	KAF6772588.1	EmuJ_000597500
MRG-1	Chromodomain	Sle31036	Mli0003484,Mli0046822	BOX15_Mlig004602,BOX15_Mlig034130,BOX15_Mlig004980	Pvi142423	Gap3292	Rro39574,Rro39575	Mfu19421	Kam9518	Sme007283.00	SMESG000022376	Bse16890		ü	Smp140950	FHE_02482	FGI_00596	FBU_09596	DEA37_0008937	KAF6771477.1	EmuJ_001091300
RHA-1	RNAhelicase	Sle28283	Mli20470,Mli0013606,Mli0009838	BOX15_Mlig024476,BOX15_Mlig034162	Pvi30456,Pvi34574,Pvi44796	Gap14944,Gap18205,Gap19310	Rro44896	Mfu38775,Mfu78255,Mfu81255	Kam3069,Kam3573,Kam3654,Kam8635	Sme000400.11,Sme000400.05	SMESG000079975,SMESG000079969	Bse44243	Eni.106436	Gsa6950771	Smp035030	FHE_03746	FGI_00002	FBU_04132	DEA37_0011852	KAF6774986.1	EmuJ_000242500
ü	Sequence contains expected functional domain
ü	Sequence without expected functional domain
