# Supplementary material for: Lost and Found: Piwi and Argonaute Pathways in Flatworms
Source: Front Cell Infect Microbiol. 2021 May 27;11:653695. doi: 10.3389/fcimb.2021.653695 (PMC8191739; doi:10.3389/fcimb.2021.653695)
Supplement: Supplementary file 14 [file Table_6.xlsx]

## Sheet: S6_piRNA_pathway_genes
Table S6. piRNA pathway genes detected in Flatworms.
		S.leucops	M.lignano	M.lignano (PRJNA371498-DV1)	P.vitattus	G.applanata	R.rostratum	M.fusca	K.amphipodicola	S.mediterranea	S.mediterranea PRJNA379262	B.semperi	E.nipponicum	G.salaris	S.mansoni	F.hepatica	F.gigantica	F.buski	P.westermani	P.kellicotti	E.granulosus
Gene	Function
ZUC	Nuclease		Mli0002726	BOX15_Mlig004543	Pvi21022	Gap37947	bg_Rros_v1_66300_0_1	Mfu7496	Kam9061		SMESG000034482
VASA	Helicase	Sle27832	Mli0003381,Mli0008330,Mli0008817,Mli0012400	BOX15_Mlig000933,BOX15_Mlig005423,BOX15_Mlig009745,BOX15_Mlig015879,BOX15_Mlig019643,BOX15_Mlig022987,BOX15_Mlig023312,BOX15_Mlig027829,BOX15_Mlig015113	Pvi65550	Gap14495,Gap19478,Gap22522,Gap27902	Rro28712,Rro32320	Mfu64615	Kam4775,Kam7523	Sme09251.0,Sme00124.8	SMESG000049071,SMESG000067941	Bse41565
HEN-1	RNA methylation		Mli14404,Mli22442,Mli0000506,Mli0015384	BOX15_Mlig032602,BOX15_Mlig008479,BOX15_Mlig023804	Pvi57227	Gap37361		Mfu13646	Kam11556		SMESG000036845
NBR	Exonuclease		Mli0009929	BOX15_Mlig013075,BOX15_Mlig031560	Pvi20797	Gap11951	bg_Rros_v1_56084_0_1	Mfu50451	Kam1029			Bse12609
PIWI	Argonaute	Sle58342	Mli0001573,Mli0011474,Mli0001743,Mli0004697	BOX15_Mlig003963,BOX15_Mlig010762,BOX15_Mlig015023,BOX15_Mlig016226,BOX15_Mlig016683,BOX15_Mlig017562,BOX15_Mlig018544,BOX15_Mlig034222,BOX15_Mlig006302	Pvi28261,Pvi28529,Pvi47833,Pvi7924	Gap14376,Gap14751	Rro24399,Rro28014,Rro43774	Mfu45028,Mfu59068,Mfu62556,Mfu83791	Kam1053,Kam3316,Kam3362	Sme010770.02,Sme003182.0,Sme002396.00,Sme001253.02,Sme000381.00	SMESG000036375,SMESG000069984,SMESG000081970,SMESG000002173,SMESG000030029,SMESG000030033,SMESG000030034,SMESG000032534,SMESG000070309	Bse12112,Bse40309
PL10	Helicase	Sle46729,Sle66886	Mli21272,Mli45582,Mli45589,Mli45603,Mli45605,Mli0009780,Mli0013127	BOX15_Mlig034455,BOX15_Mlig013881	Pvi141670	Gap17832,Gap17833,Gap3558,Gap4924	Rro27883	Mfu33765,Mfu43337,Mfu43338	Kam34403,Kam6022	Sme01067.0,Sme00039.1	SMESG000019837,SMESG000064743,SMESG000013025	Bse40346,Bse40348	Eni.410190	Gsa_14440	Smp033710,Smp068440	FHE_03534,FHE_04218,FHE_10790	FGI_06845,FGI_02604,FGI_08975	FBU_03532,FBU_10766,FBU_08714	DEA37_0011045,DEA37_0008366	KAF6768110.1,KAF6776972.1	EmuJ_000098400,EmuJ_000567900,EmuJ_001183300
FL-PL10	Helicase			BOX15_Mlig030685,BOX15_Mlig027074,BOX15_Mlig020237	Pvi51599	Gap16870	Rro16713	Mfu76686	bg_Kamp_v1_85084_0_1	Sme12107.0,Sme08832.0	SMESG000046974,SMESG000046953	Bse51060	Eni.223650	Gsa_8271	Smp154320	FHE_06737	FGI_07647	FBU_06065	DEA37_0001732		EmuJ_000777250
RdRP	RNA polymerase		Mli0004552,Mli0013431	BOX15_Mlig023635,BOX15_Mlig005031,BOX15_Mlig000965		Gap32757,Gap46700		Mfu30032
ü	Sequence contains expected functional domain
ü	Sequence without expected functional domain
