# Supplementary material for: Lost and Found: Piwi and Argonaute Pathways in Flatworms
Source: Front Cell Infect Microbiol. 2021 May 27;11:653695. doi: 10.3389/fcimb.2021.653695 (PMC8191739; doi:10.3389/fcimb.2021.653695)
Supplement: Supplementary file 15 [file Table_7.xlsx]

## Sheet: S7_Domain_conservation
Table S7. Percentage of conserved positions by domain
	Domains
	N-terminal	Linker 1	PAZ	Linker 2	MID	PIWI
Canonical Ago	0.58	0.8	0.78	0.76	0.85	0.8
FL-Ago	0.05	0.16	0.21	0.18	0.27	0.49
Piwi and FLiwi*	0.1	0.23	0.28	0.18	0.24	0.43
*No substantial difference was detected in the overall by domain conservation between Piwi and FLiwi
