# Supplementary material for: Lost and Found: Piwi and Argonaute Pathways in Flatworms
Source: Front Cell Infect Microbiol. 2021 May 27;11:653695. doi: 10.3389/fcimb.2021.653695 (PMC8191739; doi:10.3389/fcimb.2021.653695)
Supplement: Supplementary file 16 [file Table_8.xlsx]

## Sheet: S8_TestOfPositiveSelection
Table S8. Codon-based Test of Positive Selection for analysis between sequences. The probability of rejecting the null hypothesis of strict-neutrality (dN = dS) in favor of the alternative hypothesis (dN > dS) (below diagonal) is shown. Values of P equal or less than 0.05 are considered significant at the 5% level and are highlighted.
	Ago-like genes																							Piwi genes																		Fliwis
	mk4.016151.01_cds:protein_coding	Rro.52833_127806_c2_seq35	Rro.52813_127806_c2_seq14	Bse.53849_206420_c0_seq1	Smp_198380.1_cds:protein_coding	EmuJ_000346200.1_cds:protein_coding	Mfu.46046_88724_c0_seq6	Mfu.48140_88971_c3_seq3	Mli_0002732-snap-gene-0.4-mRNA-1_cds:protein_coding	Mli_0006881-snap-gene-0.8-mRNA-1_cds:protein_coding	Mli_0005390-snap-gene-0.14-mRNA-1_cds:protein_coding	Mli_0003216-snap-gene-0.5-mRNA-1_cds:protein_coding	Gap.26895_83539_c0_seq3	Pvi.28319_232861_c0_seq1	Sle.40563_57747_c0_seq1	Dme_AGO1_cds:protein_coding	Cel_alg-1	Cel_alg-2	ENSCINT00000015042.3_cds:protein_coding	Hsa_AGO1_cds:protein_coding	Hsa_AGO3-203_cds:protein_coding	Hsa_AGO4-201_cds:protein_coding	Hsa_AGO2_cds:protein_coding	mk4.000945.06_cds:protein_coding	Mfu.62556_90478_c0_seq9	Kam.3362_43274_c0_seq1	Rro.28014_121670_c1_seq1	Gap.14376_73600_c0_seq1	Pvi.28261_232715_c0_seq1	Mli_0001573-snap-gene-0.4-mRNA-1_cds:protein_coding	Mli_0011474-snap-gene-0.6-mRNA-1_cds:protein_coding	Sle.58342_59694_c0_seq3	ENSCINT00000032013.1_cds:protein_coding	Hsa_PIWIL2-201_cds:protein_coding	Hsa_PIWIL1-201_cds:protein_coding	Hsa_PIWIL3-201_cds:protein_coding	Hsa_PIWIL4-201_cds:protein_coding	Dme_AGO3-RD_cds:protein_coding	Dme_aub-RA_cds:protein_coding	Dme_piwi-RA_cds:protein_coding	Cel_prg-1	mk4.001253.02_cds:protein_coding	mk4.000381.00_cds:protein_coding	mk4.002396.00_cds:protein_coding	mk4.010770.02_cds:protein_coding	mk4.003182.00_cds:protein_coding	Kam.1053_16235_c0_seq1	Kam.3316_43188_c0_seq1	Mfu.45028_88592_c1_seq1
Kam.15076_76700_c0_seq1	-	-	-	-	-	-	-	-	-	-	-	-	-	-	-	-	-	-	-	-	-	-	-	-	-	-	-	-	-	-	-	-	-	-	-	-	-	-	-	-	-	-	-	-	-	-	-	-	-
Rro.52833_127806_c2_seq35	0.468028	-	-	-	-	-	-	-	-	-	-	-	-	-	-	-	-	-	-	-	-	-	-	-	-	-	-	-	-	-	-	-	-	-	-	-	-	-	-	-	-	-	-	-	-	-	-	-	-
Rro.52813_127806_c2_seq14	0.364241	0.0074161	-	-	-	-	-	-	-	-	-	-	-	-	-	-	-	-	-	-	-	-	-	-	-	-	-	-	-	-	-	-	-	-	-	-	-	-	-	-	-	-	-	-	-	-	-	-	-
Bse.53849_206420_c0_seq1	0.425041	0.130953	1	-	-	-	-	-	-	-	-	-	-	-	-	-	-	-	-	-	-	-	-	-	-	-	-	-	-	-	-	-	-	-	-	-	-	-	-	-	-	-	-	-	-	-	-	-	-
Smp_198380.1_cds:protein_coding	0.132741	0.0484297	1	1	-	-	-	-	-	-	-	-	-	-	-	-	-	-	-	-	-	-	-	-	-	-	-	-	-	-	-	-	-	-	-	-	-	-	-	-	-	-	-	-	-	-	-	-	-
EmuJ_000346200.1_cds:protein_coding	-	1	-	1	-	-	-	-	-	-	-	-	-	-	-	-	-	-	-	-	-	-	-	-	-	-	-	-	-	-	-	-	-	-	-	-	-	-	-	-	-	-	-	-	-	-	-	-	-
Mfu.46046_88724_c0_seq6	1	1	1	1	-	1	-	-	-	-	-	-	-	-	-	-	-	-	-	-	-	-	-	-	-	-	-	-	-	-	-	-	-	-	-	-	-	-	-	-	-	-	-	-	-	-	-	-	-
Mfu.48140_88971_c3_seq3	1	1	1	1	-	1	1	-	-	-	-	-	-	-	-	-	-	-	-	-	-	-	-	-	-	-	-	-	-	-	-	-	-	-	-	-	-	-	-	-	-	-	-	-	-	-	-	-	-
Mli_0002732-snap-gene-0.4-mRNA-1_cds:protein_coding	1	-	1	1	1	1	-	1	-	-	-	-	-	-	-	-	-	-	-	-	-	-	-	-	-	-	-	-	-	-	-	-	-	-	-	-	-	-	-	-	-	-	-	-	-	-	-	-	-
Mli_0006881-snap-gene-0.8-mRNA-1_cds:protein_coding	0.288706	1	1	1	1	1	1	1	1	-	-	-	-	-	-	-	-	-	-	-	-	-	-	-	-	-	-	-	-	-	-	-	-	-	-	-	-	-	-	-	-	-	-	-	-	-	-	-	-
Mli_0005390-snap-gene-0.14-mRNA-1_cds:protein_coding	0.274152	-	1	1	1	1	0.363113	1	1	1	-	-	-	-	-	-	-	-	-	-	-	-	-	-	-	-	-	-	-	-	-	-	-	-	-	-	-	-	-	-	-	-	-	-	-	-	-	-	-
Mli_0003216-snap-gene-0.5-mRNA-1_cds:protein_coding	0.274152	-	1	1	1	1	0.363113	1	1	1	1	-	-	-	-	-	-	-	-	-	-	-	-	-	-	-	-	-	-	-	-	-	-	-	-	-	-	-	-	-	-	-	-	-	-	-	-	-	-
Gap.26895_83539_c0_seq3	0.231093	0.313081	1	1	1	1	1	1	1	1	1	1	-	-	-	-	-	-	-	-	-	-	-	-	-	-	-	-	-	-	-	-	-	-	-	-	-	-	-	-	-	-	-	-	-	-	-	-	-
Pvi.28319_232861_c0_seq1	1	1	-	-	1	1	-	1	0.427085	1	1	1	1	-	-	-	-	-	-	-	-	-	-	-	-	-	-	-	-	-	-	-	-	-	-	-	-	-	-	-	-	-	-	-	-	-	-	-	-
Sle.40563_57747_c0_seq1	-	-	1	1	1	0.164195	1	0.309033	0.24391	1	1	1	0.344955	0.144636	-	-	-	-	-	-	-	-	-	-	-	-	-	-	-	-	-	-	-	-	-	-	-	-	-	-	-	-	-	-	-	-	-	-	-
Dme_AGO1_cds:protein_coding	1	0.296485	1	1	1	1	1	0.294894	0.422369	0.0621018	0.138597	0.138597	0.29943	0.282414	0.419046	-	-	-	-	-	-	-	-	-	-	-	-	-	-	-	-	-	-	-	-	-	-	-	-	-	-	-	-	-	-	-	-	-	-
Cel_alg-1	1	0.434197	1	1	-	1	1	0.373587	1	1	1	1	0.265657	1	0.169708	0.403188	-	-	-	-	-	-	-	-	-	-	-	-	-	-	-	-	-	-	-	-	-	-	-	-	-	-	-	-	-	-	-	-	-
Cel_alg-2	1	1	1	1	-	1	1	1	1	1	1	1	1	1	0.427321	1	1	-	-	-	-	-	-	-	-	-	-	-	-	-	-	-	-	-	-	-	-	-	-	-	-	-	-	-	-	-	-	-	-
ENSCINT00000015042.3_cds:protein_coding	0.258643	1	1	-	1	1	1	-	1	1	1	1	1	-	0.356748	1	-	1	-	-	-	-	-	-	-	-	-	-	-	-	-	-	-	-	-	-	-	-	-	-	-	-	-	-	-	-	-	-	-
Hsa_AGO1_cds:protein_coding	0.120713	0.27123	0.12253	0.373587	1	0.362325	0.280965	1	-	1	1	1	1	-	1	0.232724	1	1	-	-	-	-	-	-	-	-	-	-	-	-	-	-	-	-	-	-	-	-	-	-	-	-	-	-	-	-	-	-	-
Hsa_AGO3-203_cds:protein_coding	0.288706	1	0.243274	-	0.184149	1	1	1	1	1	1	1	1	1	0.480656	1	1	1	1	1	-	-	-	-	-	-	-	-	-	-	-	-	-	-	-	-	-	-	-	-	-	-	-	-	-	-	-	-	-
Hsa_AGO4-201_cds:protein_coding	0.315329	1	0.462951	1	0.373587	-	1	1	1	0.313351	0.467389	0.467389	1	1	1	0.18903	1	1	-	1	1	-	-	-	-	-	-	-	-	-	-	-	-	-	-	-	-	-	-	-	-	-	-	-	-	-	-	-	-
Hsa_AGO2_cds:protein_coding	0.290412	1	0.26191	1	1	1	0.44065	0.140334	-	1	1	1	1	1	0.455616	0.332613	0.346595	0.346595	1	1	-	1	-	-	-	-	-	-	-	-	-	-	-	-	-	-	-	-	-	-	-	-	-	-	-	-	-	-	-
mk4.000945.06_cds:protein_coding	1	-	0.388211	1	1	1	1	1	-	0.49565	1	1	1	-	1	1	-	-	0.00873439	-	1	1	1	-	-	-	-	-	-	-	-	-	-	-	-	-	-	-	-	-	-	-	-	-	-	-	-	-	-
Mfu.62556_90478_c0_seq9	1	1	1	0.43802	0.0604863	1	1	0.362325	1	1	1	1	0.107584	0.00200931	0.396665	0.260302	0.251079	1	-	0.441628	0.329999	0.0505221	0.343258	-	-	-	-	-	-	-	-	-	-	-	-	-	-	-	-	-	-	-	-	-	-	-	-	-	-
Kam.3362_43274_c0_seq1	0.0416774	0.266278	0.110478	1	0.0345766	-	-	1	-	0.26191	1	1	1	1	1	0.308955	-	-	-	1	1	1	-	1	0.482666	-	-	-	-	-	-	-	-	-	-	-	-	-	-	-	-	-	-	-	-	-	-	-	-
Rro.28014_121670_c1_seq1	1	1	1	1	1	0.229337	0.274152	1	1	1	1	1	-	1	-	-	-	1	1	1	1	-	-	0.241904	1	-	-	-	-	-	-	-	-	-	-	-	-	-	-	-	-	-	-	-	-	-	-	-	-
Gap.14376_73600_c0_seq1	-	1	-	0.382238	1	0.369341	0.370277	0.481723	0.167255	-	-	-	0.47321	0.382238	0.236203	1	0.419701	0.0634801	1	1	1	1	-	1	1	-	1	-	-	-	-	-	-	-	-	-	-	-	-	-	-	-	-	-	-	-	-	-	-
Pvi.28261_232715_c0_seq1	-	1	1	1	1	0.140334	0.165548	1	1	1	1	1	0.47321	1	0.23489	0.346273	0.481723	0.133602	0.269374	0.408627	0.113264	0.36313	1	0.336105	0.433521	1	0.134668	0.33849	-	-	-	-	-	-	-	-	-	-	-	-	-	-	-	-	-	-	-	-	-
Mli_0001573-snap-gene-0.4-mRNA-1_cds:protein_coding	1	-	1	0.0688079	1	0.0161831	0.133518	0.411149	0.129494	0.347755	0.129494	0.129494	0.16052	0.176998	0.335569	0.140618	0.0407762	0.155071	1	0.12581	1	1	1	1	1	1	1	0.0760729	0.391594	-	-	-	-	-	-	-	-	-	-	-	-	-	-	-	-	-	-	-	-
Mli_0011474-snap-gene-0.6-mRNA-1_cds:protein_coding	1	-	1	0.0688079	1	0.0161831	0.133518	0.411149	0.129494	0.347755	0.129494	0.129494	0.16052	0.176998	0.335569	0.140618	0.0407762	0.155071	1	0.12581	1	1	1	1	1	1	1	0.0760729	0.391594	1	-	-	-	-	-	-	-	-	-	-	-	-	-	-	-	-	-	-	-
Sle.58342_59694_c0_seq3	1	-	-	-	1	1	-	-	0.32925	0.405671	0.36637	0.36637	1	1	1	1	1	1	1	1	1	0.44065	0.390852	1	1	-	-	1	1	1	1	-	-	-	-	-	-	-	-	-	-	-	-	-	-	-	-	-	-
ENSCINT00000032013.1_cds:protein_coding	1	1	1	1	0.481723	-	-	1	1	1	1	1	1	0.188009	0.0760729	0.308955	0.326159	1	-	1	0.176547	0.140334	0.281139	1	0.140745	1	-	0.264615	0.426366	1	1	1	-	-	-	-	-	-	-	-	-	-	-	-	-	-	-	-	-
Hsa_PIWIL2-201_cds:protein_coding	1	1	0.251079	0.00671817	1	0.288706	0.179748	1	-	1	1	1	0.250592	-	1	0.337029	1	0.374485	1	0.133615	1	0.326107	0.323772	1	1	0.425593	1	1	1	1	1	1	1	-	-	-	-	-	-	-	-	-	-	-	-	-	-	-	-
Hsa_PIWIL1-201_cds:protein_coding	0.486937	1	1	1	1	0.374485	1	-	0.256002	0.106747	0.361525	0.361525	1	1	1	1	-	-	0.42205	0.12693	0.422197	1	1	0.458677	-	1	1	1	1	1	1	1	-	1	-	-	-	-	-	-	-	-	-	-	-	-	-	-	-
Hsa_PIWIL3-201_cds:protein_coding	1	1	1	1	1	0.269046	0.400524	1	1	1	1	1	1	1	1	-	1	1	1	1	1	-	1	1	-	1	1	0.374024	0.222351	1	1	-	-	-	0.490327	-	-	-	-	-	-	-	-	-	-	-	-	-	-
Hsa_PIWIL4-201_cds:protein_coding	0.119504	1	0.415705	0.0656764	0.167022	1	0.43802	1	1	0.474313	0.43802	0.43802	0.271243	1	1	-	-	0.461164	0.305839	1	1	1	1	0.0747964	1	1	1	1	1	1	1	1	1	0.434197	1	1	-	-	-	-	-	-	-	-	-	-	-	-	-
Dme_AGO3-RD_cds:protein_coding	1	0.425041	1	-	0.356334	1	1	0.305839	1	1	1	1	1	0.474313	1	1	1	1	1	1	0.0730036	0.363113	1	1	0.23489	0.0916027	1	1	1	1	1	0.345709	0.188009	-	-	1	1	-	-	-	-	-	-	-	-	-	-	-	-
Dme_aub-RA_cds:protein_coding	0.229337	0.460258	0.395297	0.0339921	1	1	1	1	1	0.392477	1	1	1	1	1	0.0775045	1	1	-	0.462951	-	1	1	0.422197	1	-	1	0.388211	1	0.240927	0.240927	-	-	0.0128088	1	1	0.5	-	-	-	-	-	-	-	-	-	-	-	-
Dme_piwi-RA_cds:protein_coding	1	1	1	0.237391	1	1	1	1	1	0.296696	0.342676	0.342676	0.44065	1	0.152766	0.0431692	1	-	-	2.46978e-06	0.258041	0.382238	1	0.5	1	0.44546	1	1	1	0.1267	0.1267	-	1	0.237391	1	-	0.342676	1	1	-	-	-	-	-	-	-	-	-	-
Cel_prg-1	1	1	1	1	0.215035	-	1	1	0.234419	0.157537	0.329999	0.329999	1	1	1	0.260302	1	1	1	1	0.43802	0.00200931	0.257802	-	0.148682	0.388211	1	1	-	1	1	0.0747964	0.369341	1	0.441628	1	0.265886	1	1	1	-	-	-	-	-	-	-	-	-
mk4.001253.02_cds:protein_coding	1	1	1	1	1	1	-	-	1	1	1	1	1	1	-	1	1	-	1	-	-	-	-	0.000917937	1	-	1	1	0.296985	0.189504	0.189504	-	-	1	-	-	0.44065	-	1	1	-	-	-	-	-	-	-	-	-
mk4.000381.00_cds:protein_coding	1	1	-	1	1	1	1	-	1	1	1	1	1	-	1	1	-	1	-	1	-	-	-	1	1	1	1	1	1	0.0446991	0.0446991	1	-	1	0.382238	1	0.229724	1	1	1	0.47321	-	-	-	-	-	-	-	-
mk4.002396.00_cds:protein_coding	1	0.482666	0.419701	1	0.458952	1	1	1	1	0.296696	0.342676	0.342676	0.257802	1	0.156954	0.430149	1	1	-	0.0443127	1	0.0267794	0.132893	1	0.473429	0.363961	-	1	1	0.274152	0.274152	-	0.414283	1	1	-	-	0.418612	1	0.26253	0.0688561	-	-	-	-	-	-	-	-
mk4.010770.02_cds:protein_coding	1	1	1	1	1	1	-	-	1	1	1	1	1	1	-	1	1	-	1	-	-	-	-	0.000917937	1	-	1	1	0.296985	0.189504	0.189504	-	-	1	-	-	0.44065	-	1	1	-	1	-	-	-	-	-	-	-
mk4.003182.00_cds:protein_coding	0.422174	0.420511	0.237251	0.140281	0.0198708	1	0.130934	1	-	0.432379	0.432379	0.432379	0.146043	1	1	1	1	0.237251	0.0917808	1	0.0336433	0.320051	0.173186	1	0.472554	0.356384	1	1	1	1	1	1	1	1	1	0.274238	9.95633e-05	1	0.382615	1	0.456059	0.119996	0.314619	0.405941	0.119996	-	-	-	-
Kam.1053_16235_c0_seq1	0.166015	0.215372	0.481332	1	1	-	1	-	1	0.160597	0.25162	0.25162	-	-	1	1	-	1	0.265773	0.296648	0.0879568	0.343965	0.461423	0.173226	1	0.364186	1	1	1	1	1	1	-	0.172077	0.420349	1	0.126196	1	1	-	0.487662	-	1	1	-	0.473429	-	-	-
Kam.3316_43188_c0_seq1	1	0.495409	1	1	1	1	1	-	0.472319	0.422197	0.472319	0.472319	1	1	0.394958	0.426243	-	-	0.159242	0.482666	0.198476	1	1	0.167255	1	1	1	-	1	0.0890588	0.0890588	1	1	1	0.143636	1	0.321069	1	1	1	1	1	0.433521	1	1	1	1	-	-
Mfu.45028_88592_c1_seq1	0.251079	1	0.370968	0.34914	0.052876	-	-	-	1	0.280965	0.449103	0.449103	1	1	1	1	-	-	1	-	1	1	-	0.473429	-	1	1	-	1	1	1	1	1	0.422197	0.0252263	1	1	1	1	1	0.280965	1	1	-	1	0.176693	0.182376	0.085561	-
Mfu.83791_92034_c0_seq2	0.229724	1	0.418612	-	0.33407	1	0.482666	1	-	1	1	1	1	1	0.384746	1	-	1	1	1	0.210829	1	1	1	1	1	1	-	0.161611	1	1	1	1	1	0.35256	0.419701	1	0.0908404	-	1	1	-	1	1	-	0.100516	0.00386569	0.134564	-
Mfu.59068_90130_c1_seq1	1	-	-	1	1	-	-	1	0.326107	0.434197	0.329999	0.329999	1	0.467389	0.24391	1	1	1	1	-	1	1	0.44065	1	1	-	1	1	0.485395	1	1	0.229724	0.26191	1	1	1	1	1	1	1	0.45901	1	1	1	1	0.336137	-	1	1
Bse.40309_136150_c0_seq1	-	-	1	0.432039	1	0.275616	1	-	0.20014	1	1	1	0.315736	1	0.017878	1	1	1	1	0.298374	1	0.0887007	0.258041	0.485395	1	1	-	1	0.296686	1	1	1	1	1	1	-	-	0.393348	1	1	0.321069	-	-	1	-	-	1	1	1
Rro.24399_119763_c0_seq1	1	1	0.315119	0.191943	1	-	0.412623	1	1	0.00164785	0.0165107	0.0165107	0.349632	-	1	1	-	1	0.428949	0.203728	1	0.137387	0.216958	0.447283	1	0.0474917	-	-	1	1	1	1	1	0.218856	1	1	1	1	0.118876	0.203602	0.137387	-	1	0.364186	-	0.298374	0.201606	1	0.186319
Rro.43774_126282_c0_seq3	1	1	1	-	1	1	1	1	1	1	0.487662	0.487662	-	1	1	1	1	1	1	1	1	0.444866	1	-	1	1	1	0.485967	0.390175	0.38233	0.38233	1	1	1	-	1	-	0.343965	-	1	0.172077	-	1	1	-	-	0.18747	1	-
Gap.14751_74055_c0_seq1	0.0345766	0.315831	0.261616	1	0.220214	1	0.294	0.329351	-	1	1	1	0.433521	0.294	1	0.238883	0.261353	0.261353	1	1	1	0.294	0.41209	1	1	0.110197	1	-	-	-	-	1	0.484607	1	1	0.461788	0.222351	1	-	1	0.22162	-	0.479825	0.249669	-	0.23123	0.39209	1	1
Pvi.28529_233294_c0_seq1	1	1	0.224929	1	0.0932797	-	1	-	1	1	1	1	1	1	0.274197	0.397934	-	-	0.454349	1	0.419701	1	-	1	1	1	-	-	1	0.234419	0.234419	1	1	-	0.137758	-	1	0.193721	1	1	1	-	-	1	-	1	0.00891494	0.132893	1
Pvi.7924_104729_c0_seq1	1	1	1	-	1	0.425593	0.433521	1	1	0.326159	1	1	1	0.342676	1	1	1	0.481723	1	1	1	1	1	-	0.473429	1	1	1	0.245629	1	1	1	0.371756	1	-	-	-	0.0915824	-	1	0.0688561	-	1	1	-	1	0.457252	1	-
Mli_0001743-snap-gene-1.12-mRNA-1_cds:protein_coding	0.210603	1	0.465383	1	1	1	0.24842	1	1	1	1	1	1	1	1	1	1	1	1	1	1	1	1	-	1	1	1	0.495409	0.374485	0.113575	0.113575	-	-	1	1	1	1	0.297007	-	0.486937	0.411115	-	0.291532	1	-	1	0.283179	1	-
Mli_0004697-snap-gene-0.2-mRNA-1_cds:protein_coding	1	1	1	0.475901	1	1	1	1	0.0500493	1	1	1	1	1	1	1	1	1	1	1	1	1	1	1	-	1	1	1	1	0.077987	0.077987	1	-	1	1	1	1	1	0.477263	1	1	0.402946	0.149028	-	0.402946	1	1	1	1
Sle.67413_60303_c0_seq7	0.0596062	1	1	1	0.462951	1	1	1	1	1	1	1	1	0.197336	1	0.141947	0.0912549	0.0912549	-	1	1	1	1	-	0.391594	1	1	1	1	0.429151	0.429151	1	1	1	1	1	0.391594	1	1	1	0.0172064	-	0.400524	0.143636	-	0.277629	0.410879	0.495409	1
Mli_0016590-snap-gene-0.1-mRNA-1_cds:protein_coding	-	0.422197	-	1	-	0.422197	1	0.143636	0.159242	1	1	1	0.334569	0.44065	0.0669915	1	0.210829	1	-	1	-	-	0.255324	1	0.456864	-	1	0.416571	1	0.243552	0.243552	-	0.458952	0.42205	1	1	-	1	0.20014	1	-	1	-	1	1	-	-	-	-
Gap.9354_64421_c0_seq1	1	1	-	1	1	-	-	-	1	0.269046	0.478954	0.478954	1	-	0.194804	0.380305	1	-	1	0.47321	-	0.374485	1	0.20429	-	1	-	1	0.255324	0.026045	0.026045	1	1	0.120713	1	-	0.140876	1	1	1	-	1	1	1	1	1	1	1	0.19863
Rro.36342_124635_c0_seq1	1	0.163183	0.419701	0.167255	0.296686	-	1	1	0.296696	1	0.342676	0.342676	1	1	-	-	1	1	1	1	1	1	-	0.416571	-	1	1	1	0.194391	1	1	-	-	0.220013	-	1	1	-	0.188009	0.255837	0.240544	0.5	-	-	0.5	0.411208	1	1	0.224608
Bse.12292_114187_c0_seq1|.12292	1	1	1	1	0.412623	1	1	1	0.244597	1	1	1	1	0.3431	0.268257	0.184455	0.371118	0.371118	0.161906	0.488775	0.380443	0.232724	0.143692	1	1	1	1	0.174858	0.238883	0.293446	0.293446	0.100782	1	-	0.36047	1	0.232724	0.440883	0.171383	1	0.426243	0.351842	0.351842	0.146043	0.351842	0.393348	0.482398	1	0.410879
Mfu.83113_92001_c1_seq2	1	1	1	1	-	1	1	1	1	1	1	1	1	-	0.45019	1	1	1	-	0.167255	1	1	1	1	1	1	1	0.188018	3.23837e-05	0.179352	0.179352	-	1	0.0393391	-	1	0.47321	1	0.425008	0.178839	-	1	1	0.41585	1	1	1	1	1
mk4.000678.07_cds:protein_coding	0.00384699	0.102947	0.157767	0.444813	0.00117578	-	-	-	-	1	1	1	0.225587	1	-	0.0992007	-	-	0.485395	0.378304	0.312842	0.407035	1	1	0.24873	0.00787499	0.267312	-	-	-	-	1	0.410841	-	0.00351345	0.206742	0.00514732	0.0135242	1	1	0.188009	1	0.133957	0.264615	1	0.0342579	0.0102906	0.143576	0.266019
mk4.000678.05_cds:protein_coding	0.20014	0.400524	0.140334	1	1	1	1	1	-	1	1	1	1	1	0.435276	0.180296	1	-	0.482666	0.433521	0.0416774	1	1	1	1	1	1	1	0.253915	0.145192	0.145192	-	1	0.370968	1	1	0.257802	0.180769	1	0.329351	1	1	-	1	1	0.112749	0.231423	1	-
Pvi.73968_270557_c0_seq1	1	1	0.280965	0.342791	1	1	1	0.20014	1	1	1	1	1	1	1	0.331909	1	1	-	0.44065	1	1	1	-	-	1	1	0.255324	0.33407	0.272703	0.272703	1	1	0.111003	1	0.47321	1	1	0.23489	0.193473	-	0.482666	0.26191	0.133602	0.482666	-	0.367229	1	1
EmuJ_000739100.1_cds:protein_coding	1	1	1	0.363441	0.361525	0.0217895	0.0190041	0.111003	1	1	0.43802	0.43802	0.0158095	0.180879	1	1	0.0844339	0.0844339	1	0.103818	1	1	1	1	0.399794	0.464866	1	1	1	1	1	-	0.466784	-	1	0.281776	-	1	0.460263	0.233814	1	-	1	0.460513	-	1	1	1	-
EmuJ_000911700.1_cds:protein_coding	1	1	1	0.363441	0.361525	0.0217895	0.0190041	0.111003	1	1	0.43802	0.43802	0.0158095	0.180879	1	1	0.0844339	0.0844339	1	0.103818	1	1	1	1	0.399794	0.464866	1	1	1	1	1	-	0.466784	-	1	0.281776	-	1	0.460263	0.233814	1	-	1	0.460513	-	1	1	1	-
EmuJ_000911600.1_cds:protein_coding	1	0.466187	0.447283	0.443451	0.234396	0.0746302	0.0284774	0.0364464	-	1	1	1	0.164664	0.0951269	-	1	0.0313139	0.0313139	1	0.366612	1	1	0.320051	0.252931	0.473793	0.0778181	1	1	1	1	1	-	0.351581	1	0.478703	0.0804638	1	1	0.428949	0.208942	0.2978	-	1	0.362622	-	1	0.422197	1	1
Smp_102690.1_cds:protein_coding	1	-	-	1	-	1	1	-	1	1	0.361525	0.361525	0.437307	1	1	-	1	1	1	-	-	-	-	0.320474	-	-	0.478954	1	1	0.109615	0.109615	1	-	1	1	1	0.305988	1	0.495409	-	1	1	1	-	1	0.4064	-	-	1
Smp_179320.1_cds:protein_coding	1	1	1	1	0.34914	1	1	1	-	1	1	1	0.173497	1	1	-	0.269046	0.269046	0.36921	1	1	1	1	0.312819	1	1	1	-	1	-	-	0.159242	1	1	1	-	1	-	0.427962	1	0.363441	0.334572	-	1	0.334572	0.26682	1	1	0.314696
[truncated: 24 more columns]
