# Supplementary material for: Lost and Found: Piwi and Argonaute Pathways in Flatworms
Source: Front Cell Infect Microbiol. 2021 May 27;11:653695. doi: 10.3389/fcimb.2021.653695 (PMC8191739; doi:10.3389/fcimb.2021.653695)
Supplement: Supplementary file 17 [file Table_9.xlsx]

## Sheet: S9_Vasa_identity_table
	Table S9. Percentage of indentity between PL10-related, Flatworm PL-10 and Vasa-related groups, and D. melanogasters and C. elegans DEAD helicases
		Dme_BEL	Dme_VASA	Dme_Rm62	Cel_laf-1	Cel_GLH	Cel_ddx17	Cel_eIF4A
PL10-related	Ngvlg1	0.397	0.305	0.241	0.415	0.125	0.266	0.182
	Dre_PL10	0.463	0.305	0.253	0.448	0.128	0.287	0.188
	Sle46729	0.361	0.256	0.217	0.376	0.135	0.244	0.17
	Sle66886	0.28	0.207	0.175	0.278	0.109	0.192	0.135
	Mli21272	0.325	0.239	0.209	0.328	0.107	0.227	0.168
	Mli0009780	0.144	0.102	0.086	0.133	0.069	0.088	0.059
	Mli0013127	0.173	0.126	0.108	0.167	0.077	0.112	0.081
	Rro27883	0.335	0.261	0.222	0.373	0.109	0.281	0.256
	Bse40346	0.433	0.291	0.232	0.416	0.139	0.273	0.171
	Gap17832	0.396	0.262	0.221	0.375	0.129	0.249	0.18
	Gap17833	0.366	0.281	0.215	0.356	0.136	0.243	0.196
	Pvi141670	0.398	0.299	0.24	0.438	0.121	0.305	0.248
	Mfu33765	0.365	0.283	0.232	0.398	0.12	0.288	0.25
	Mfu43337	0.312	0.224	0.189	0.303	0.115	0.204	0.163
	Mfu43338	0.411	0.297	0.235	0.422	0.134	0.268	0.203
	Csi103532	0.255	0.189	0.169	0.246	0.101	0.174	0.139
	Ovi_00289	0.226	0.167	0.153	0.216	0.101	0.153	0.121
	FHEP_10790	0.14	0.109	0.117	0.15	0.057	0.134	0.142
	Sma_068440	0.258	0.203	0.163	0.244	0.103	0.175	0.14
	Sja_0101220	0.336	0.29	0.229	0.342	0.134	0.264	0.228
	FHEP_04218	0.235	0.196	0.154	0.233	0.094	0.156	0.132
	Csi103662	0.204	0.149	0.112	0.193	0.08	0.129	0.119
	Csi110120	0.405	0.296	0.228	0.431	0.13	0.274	0.203
	Ovi_11931	0.391	0.281	0.221	0.392	0.134	0.239	0.171
	FHEP_03534	0.431	0.309	0.227	0.432	0.133	0.267	0.192
	Sma_033710	0.415	0.301	0.239	0.435	0.133	0.265	0.202
	Sja_0113730	0.332	0.264	0.207	0.35	0.115	0.224	0.192
	Egr0098400	0.44	0.318	0.251	0.445	0.132	0.288	0.199
	Emu0098400	0.439	0.317	0.25	0.443	0.132	0.291	0.197
	Tso1238500	0.442	0.325	0.253	0.449	0.136	0.292	0.199
	Hmi0797000	0.411	0.295	0.238	0.417	0.133	0.264	0.186
	Mli45582	0.366	0.263	0.218	0.354	0.116	0.26	0.189
	Mli45589	0.369	0.269	0.22	0.357	0.118	0.267	0.198
	Mli45603	0.306	0.246	0.189	0.308	0.113	0.219	0.19
	Mli45605	0.37	0.268	0.218	0.359	0.122	0.252	0.186
	Bse40348	0.376	0.282	0.222	0.352	0.132	0.242	0.174
	Gap4924	0.268	0.186	0.169	0.247	0.13	0.157	0.117
	Egr1183300	0.211	0.184	0.143	0.226	0.088	0.174	0.139
	Emu1183300	0.24	0.203	0.166	0.246	0.105	0.185	0.136
	Tso0393600	0.245	0.214	0.173	0.255	0.107	0.189	0.141
	Hmi0061900	0.249	0.215	0.175	0.264	0.108	0.188	0.136
	Hmi1021800	0.208	0.194	0.152	0.231	0.091	0.167	0.133
	Emu0567900	0.266	0.234	0.2	0.297	0.102	0.255	0.212
	Gap3558	0.372	0.265	0.233	0.379	0.139	0.254	0.161
	Kam34403	0.379	0.303	0.233	0.383	0.122	0.272	0.191
	Sme00039.1	0.313	0.272	0.223	0.337	0.131	0.234	0.185
	Sme01067.0	0.332	0.276	0.217	0.362	0.117	0.268	0.224
	Gsa_14440	0.328	0.283	0.234	0.381	0.141	0.286	0.203
	Kam6022	0.263	0.207	0.175	0.272	0.11	0.194	0.161
Flatworm-PL-10	Ngvlg2	0.19	0.179	0.173	0.229	0.1	0.201	0.216
	Csi111543	0.179	0.169	0.156	0.213	0.098	0.196	0.189
	Ovi_01259	0.164	0.152	0.156	0.173	0.131	0.146	0.128
	FHEP_06373	0.186	0.175	0.181	0.223	0.102	0.206	0.18
	Sma_154320	0.175	0.171	0.166	0.214	0.091	0.201	0.183
	Sja_0049470	0.187	0.183	0.174	0.231	0.097	0.207	0.216
	Egr0777250	0.177	0.167	0.167	0.222	0.092	0.194	0.211
	Emu0777250	0.177	0.167	0.168	0.222	0.092	0.194	0.211
	Tso1019200	0.186	0.177	0.176	0.233	0.107	0.214	0.211
	Hmi0997100	0.187	0.184	0.168	0.234	0.098	0.206	0.19
	Gsa_8271	0.184	0.185	0.162	0.237	0.098	0.209	0.195
	Bse51060	0.222	0.226	0.205	0.255	0.113	0.257	0.215
	Sme12107.0	0.19	0.198	0.191	0.235	0.1	0.223	0.215
	Sme08832.0	0.183	0.189	0.189	0.236	0.095	0.223	0.216
	Kam34475	0.2	0.217	0.193	0.244	0.099	0.23	0.216
	Mfu76686	0.19	0.19	0.196	0.241	0.106	0.223	0.213
	Rro16713	0.195	0.197	0.198	0.217	0.111	0.209	0.179
	Gap16870	0.158	0.16	0.148	0.19	0.092	0.179	0.169
	Pvi51599	0.158	0.162	0.138	0.187	0.094	0.16	0.193
Vasa-related	Dre_VASA	0.282	0.389	0.234	0.315	0.167	0.256	0.166
	Ngvlg3	0.225	0.246	0.19	0.256	0.158	0.214	0.207
	Sle27832	0.205	0.236	0.184	0.237	0.132	0.205	0.186
	Rro28712	0.129	0.148	0.126	0.155	0.091	0.164	0.148
	Rro32320	0.132	0.162	0.115	0.16	0.097	0.165	0.127
	Mli0008330	0.121	0.118	0.1	0.107	0.116	0.098	0.067
	Mli0012400	0.077	0.075	0.064	0.069	0.078	0.061	0.04
	Mli0008817	0.121	0.129	0.098	0.113	0.126	0.095	0.067
	Mli0003381	0.222	0.257	0.209	0.251	0.122	0.259	0.198
	Pvi65550	0.226	0.283	0.188	0.252	0.168	0.22	0.162
	Gap14495	0.104	0.146	0.105	0.111	0.108	0.087	0.07
	Gap22522	0.208	0.268	0.176	0.221	0.177	0.182	0.117
	Gap27902	0.226	0.262	0.216	0.249	0.153	0.221	0.161
	Bse41565	0.256	0.297	0.204	0.306	0.144	0.257	0.225
	Mfu64615	0.227	0.289	0.184	0.287	0.143	0.261	0.229
	Gap19478	0.08	0.092	0.076	0.088	0.047	0.07	0.071
	Kam4775	0.209	0.284	0.184	0.228	0.161	0.2	0.149
	Kam7523	0.22	0.275	0.199	0.254	0.143	0.239	0.189
	Sme09251.0	0.239	0.281	0.194	0.279	0.13	0.245	0.206
	Sme00124.8	0.235	0.294	0.206	0.291	0.136	0.254	0.214
