# Supplementary material for: Lost and Found: Piwi and Argonaute Pathways in Flatworms
Source: Front Cell Infect Microbiol. 2021 May 27;11:653695. doi: 10.3389/fcimb.2021.653695 (PMC8191739; doi:10.3389/fcimb.2021.653695)
Supplement: Supplementary file 18 [file Table_10.xlsx]

## Sheet: Hoja1
Table S10. Detailed information and source of the sequences used in the construction of the gene trees
Chordata	Species		Database		Databases color key
	Human				https://www.ncbi.nlm.nih.gov/
		Hsa_Ago1	NM_012199.4		https://www.ensembl.org/
		Hsa_Ago2	XM_011516968.2		http://flybase.org/
		Hsa_Ago3	NM_177422.2		https://wormbase.org/
		Hsa_Ago4	XM_011540884.2
		Hsa_piwil1	XM_017020229.1
		Hsa_piwil2	NM_001135721.1
		Hsa_piwil3	NM_001008496.3
		Hsa_piwil4	NM_152431.2
		Dcr_1	ENSP00000435681
		Drosha	ENSP00000425979
	Mus musculus
		Dcr_1	ENSMUSP00000043676
		Drosha	ENSMUSP00000129279
	Gallus gallus
		Dcr 1	ENSGALP00000046917
		Drosha	ENSGALP00000042067
	Danio rerio
		Dcr 1	ENSDARP00000045880
		Drosha	ENSDARP00000153862
		Vasa	ENSDARP00000111634
		Bel	ENSDARP00000092924
	Branchiostoma floridae
		Bfl_AGO1	XM_002589344.1
		Bfl_AGO2	XM_002589997.1
		Bfl_Piwil1	KC516709.1
		Bfl_Piwil2	KC516710.1
	Ciona intestinalis
		Dcr 1	ENSCINP00000017117
		Drosha	ENSCINP00000003015
Arthropoda	Species		Database
	Drosophila melanogaster
		Dme_Ago1	NM_079010.4
		Dme_Ago2	NM_140518.3
		Dme_Ago3	NM_001043162.3
		Dme_Piwi	AF104354.1
		Dme_Aub	NM_057386.5
		Dcr_1	FBpp0083717
		Dcr_2	FBpp0086061
		Drosha	FBpp0087926
		Vasa	FBpp0401447
		Bel	FBpp0081374
	Tribolium castaneum
		Tca_Ago1	XM_015982502.1
		Tca_Ago2a	M_008202051.2
		Tca_Agob	XM_008194763.2
		Tca_Piwi1	XM_008194203.2
		Tca_Aub	XM_008198081.2
	Limulus polyphemus
		Lpo_Ago1	XM_013931086.1
		Lpo_Ago2	XM_013926285.1
		Lpo_Piwi1	XM_013918768.1
	Parasteatoda tepidariorum
		Pte_Ago1	XM_016050247.1
		Pte_Ago2	XM_016050249.1
		Pte_Ago3	XM_016074512.1
		Pte_Ago4	XM_016050252.1
		Pte_Piwi1	XM_016048783.1
		Pte_Piwi2	XM_016075529.1
Nematoda	Species		Database
	Caenorhabditis elegans
		Cel_Alg1	NM_001270310.1
		Cel_Alg2	NM_061436.3
		Cel_Ergo1	NM_070961.7
		Cel_Rde1	NM_171525.4
		Cel_SAGO1	NM_072209.3
		Cel_SAGO2	NM_182059.3
		Cel_PPW2	NM_059134.5
		Cel_Hpo24	NM_060242.4
		Cel_PRG1	NM_059720.5
		Cel_PRG2	NM_068593.6
		Cel_glh	T21G5.3
		Cel_laf-1	Y71H2AM.19
	Necator americanus
		Nam_ALG1	XM_013443759.1
		Nam_RDE1like	XM_013450933.1
		Nam_WAGO2	XM_013437700.1
		Nam_WAGO1	XM_013451313.1
		Nam_PIWI	XM_013437264.1
Mollusca	Species		Database
	Octopus bimaculoides
		Piwi_1	Ocbimv22033703m
		Piwi_2	Ocbimv22018299m
		Ago	Ocbimv22036694m
		Ago	Ocbimv22036423m
	Lottia gigantea
		Ago	LotgiG235802
		Piwi_1	LotgiG131825
		Piwi_2	LotgiG210915
	Biomphalaria glabrata
		Ago	BGLB002396
		Piwi_1	BGLB010170
		Piwi_2	BGLB028315
Annelida	Species		Database
	Capitella teleta
		Cte_Ago1	CapteP143595
		Cte_PIWI1	CapteP154759
		Cte_PIWI2	CapteP163584
Rotifera	Species		Database
	Brachionus calyciflorus
		AGO1	CAF0731815.1
		AGO2.1	CAF0875423.1
		AGO2.2	CAF1055573.1
		PIWI1	CAF0718229.1
		PIWI2	CAF0945926.1
		PIWI3	CAF0712618.1
		PIWI4	CAF0706255.1
Cnidaria	Species		Database
	Nemastella vectensis
		Nve_Ago1	KF192061.1
		Nve_Ago2	KF192062.1
		Nve_Piwil	KU746924.1
		Nve_Piwil	XM_001641944.1
		Nve_Piwil	XM_001626077.1
Porifera	Species		Database
	Amphimedon queenslandica
		Aqu_Ago1	XM_019995499.1
		Aqu_Ago2	XM_020008918.1
		Aqu_Piwil	XM_020007102.1
		Aqu_piwi2	XP_019856843.1
Gastroticha			Database
	Lepidodermella squamata		Transcriptome downloaded from doi:10.5061/dryad.622q4
